# Supplementary material
Source: PubMed Central journal article supplement (PMC2707594)

# Supplementary data

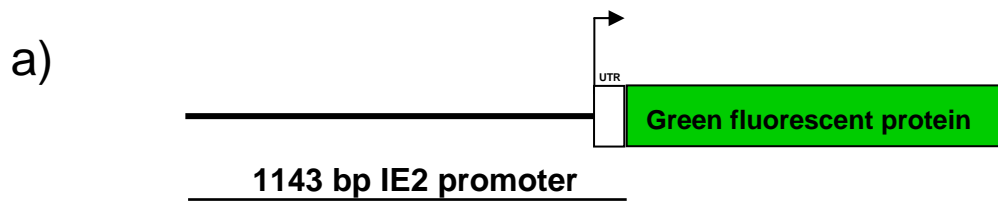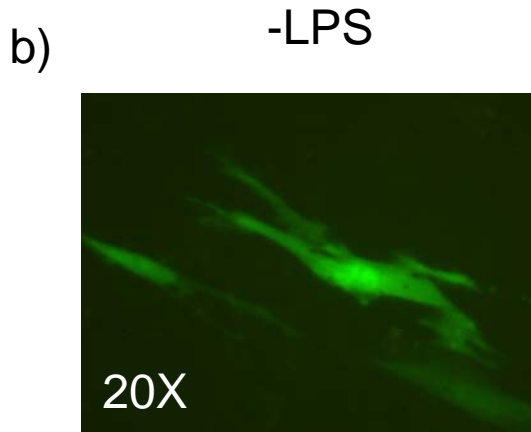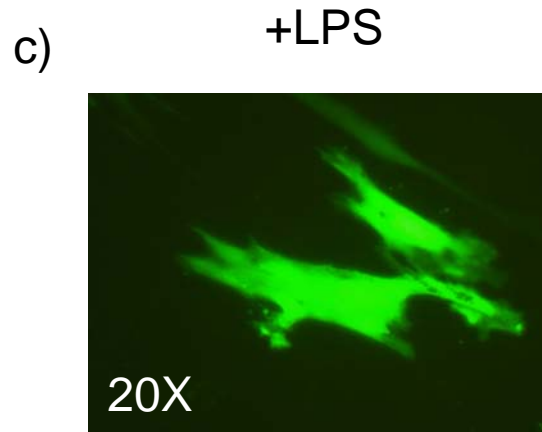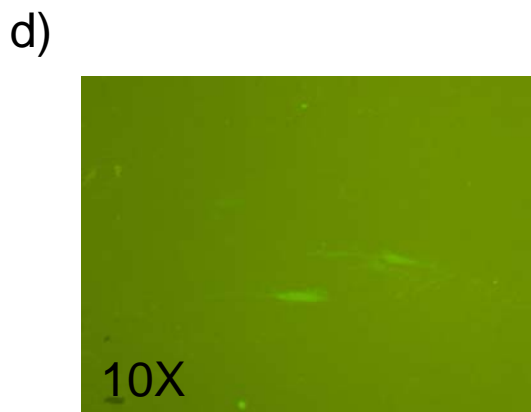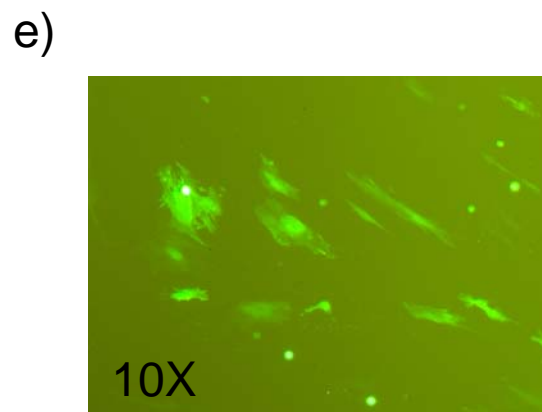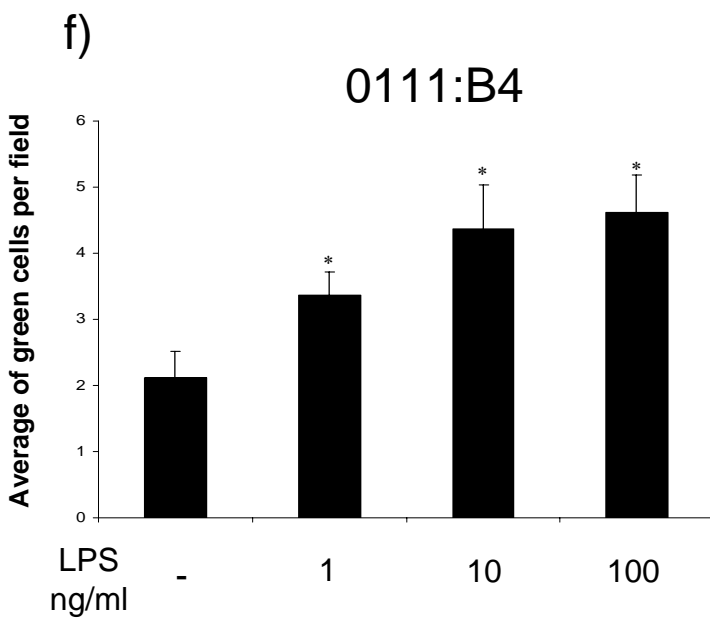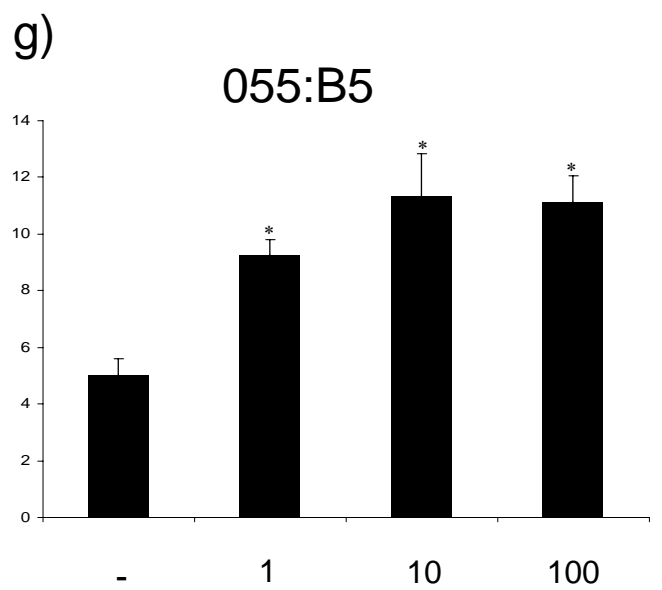

Supplement: NIHMS27189-supplement-1.pdf [file NIHMS27189-supplement-1.pdf]
